# Putting Bicarbonate on the spot

## Implication for therotyping in Cystic Fibrosis

Mirosław Zajac<sup>1,2,3,4</sup>, Agathe Lepissier<sup>1,2,3</sup>, Elise Dréano<sup>1,2,3</sup>, Benoit Chevalier<sup>1,2,3</sup>, Aurélie Hatton<sup>1,2,3</sup>, Mairead Kelly<sup>1,2,3</sup>, Daniela Guidone<sup>5</sup>, Gabrielle Planelles<sup>6</sup>, Aleksander Edelman<sup>1,2,3</sup>, Emmanuelle Girodon<sup>7</sup>, Alexandre Hinzpeter<sup>1,2,3</sup>, Gilles Crambert<sup>6</sup>, Iwona Pranke<sup>1,2,3</sup>, Luis J.V. Galiotta<sup>5</sup>, Isabelle Sermet-Gaudelus<sup>1,2,3,8,\*</sup>

<sup>1</sup> INSERM U1151, Institut Necker Enfants Malades, Paris, France

<sup>2</sup> Université de Paris-Cité

<sup>3</sup> Centre de Référence Maladie Rare Pour La Mucoviscidose et Maladies de CFTR. Hôpital Necker Enfants Malades. Assistance Publique Hôpitaux de Paris, Paris, France

<sup>4</sup> Department of Physics and Biophysics, Institute of Biology, Warsaw University of Life Sciences, Warsaw, Poland

<sup>5</sup> Telethon Institute of Genetics and Medicine, Pozzuoli, Italy

<sup>6</sup> U1138/CNRS ERL 8228, Centre de Recherche des Cordeliers, Paris, France

<sup>7</sup> Service de Médecine Génomique des Maladies de Système et d'Organe, Hôpital Cochin, Assistance Publique Hôpitaux de Paris, Paris, France

<sup>8</sup> European Reference Network for Rare Diseases, ERN Lung, Belgium

\* Correspondence: [isabelle.sermet@aphp.fr](mailto:isabelle.sermet@aphp.fr)

### Abstract:

Cystic fibrosis (CF) is caused by defective Cystic Fibrosis Transmembrane Conductance Regulator (CFTR) protein. CFTR controls chloride (Cl<sup>-</sup>) and bicarbonate (HCO<sub>3</sub><sup>-</sup>) transport into the Airway Surface Liquid (ASL). We investigated the impact of F508del-CFTR correction on HCO<sub>3</sub><sup>-</sup> secretion by studying transepithelial HCO<sub>3</sub><sup>-</sup> fluxes.

HCO<sub>3</sub><sup>-</sup> secretion was measured by pH-stat technique in primary human respiratory epithelial cells from healthy subjects (WT) and people with CF (pwCF) carrying at least one F508del variant. Its changes after CFTR modulation by the triple combination VX445/661/770 and in the context of TNF- $\alpha$ +IL-17 induced inflammation were related to ASL pH and transcriptional levels of CFTR and other HCO<sub>3</sub><sup>-</sup> transporters of airway epithelia such as SLC26A4 (Pendrin), SLC26A9 and NBCe1.

CFTR-mediated HCO<sub>3</sub><sup>-</sup> secretion was not detected in F508del primary human respiratory epithelial cells. It was rescued up to ~ 80% of the WT level by VX-445/661/770. In contrast, TNF- $\alpha$ +IL-17 normalized transepithelial HCO<sub>3</sub><sup>-</sup> transport and ASL acidic pH. This was related to an increase in SLC26A4 and CFTR transcript levels. VX-445/661/770 induced an increase in pH only in the context of

inflammation. Effects on  $\text{HCO}_3^-$  transport were not different between F508del homozygous and F508del heterozygous CF airway epithelia.

Our studies show that correction of F508del-CFTR  $\text{HCO}_3^-$  is not sufficient to buffer acidic ASL and that inflammation is a key regulator of  $\text{HCO}_3^-$  secretion in CF airways. Prediction of the response to CFTR modulators by therapy should take into account airway inflammation.

## 1. Introduction

Airway epithelium interfaces between the internal milieu and the external environment. It is lined by a thin layer of fluid called Airway Surface Liquid (ASL) whose composition is finely tuned. There is increasing evidence that defects in ASL pH regulation are associated with various respiratory diseases, including Cystic Fibrosis (CF) (Cutting, 2015). CF is a life limiting disease caused by mutations in the cystic fibrosis transmembrane conductance regulator (*CFTR*) gene. The most frequent mutation, p.Phe508del, F508del thereafter, is carried by around 80% of people with CF (pwCF) worldwide and results in defective CFTR protein trafficking due to protein misfolding, reduced stability at the cell surface and dysfunctional channel gating (Pranke et al., 2019).

CFTR transports two of the most abundant and physiologically important anions: chloride ( $\text{Cl}^-$ ) and bicarbonate ( $\text{HCO}_3^-$ ) into the ASL (Quinton, 2008).  $\text{HCO}_3^-$  plays a key role in epithelial surface homeostasis by ensuring adequate water content, controlling volume and pH of the periciliary layer, and regulating mucin biophysical properties such as hydration. All these factors are necessary for efficient muco-ciliary clearance (MCC) (Bridges, 2012; Ferrera et al., 2021; Gorrieri et al., 2016; Quinton, 2008; Tang et al., 2016). Mutations of the CFTR channel have mainly been characterized by their disruption of  $\text{Cl}^-$  transport, however they also display defective  $\text{HCO}_3^-$  transport which is intimately related to CF disease (Quinton, 2001). At the pulmonary level, deficient  $\text{HCO}_3^-$  secretion was shown to decrease ASL hydration, reduce its pH which further compromises mucin formation, mucociliary clearance, and impairs the airway host defenses (Garland et al., 2013; Hoegger et al., 2014; Shah et al., 2016; Simonin et al., 2019). The addition of  $\text{HCO}_3^-$  onto the CF epithelium was shown to increase ASL height and pH (Garland et al., 2013), improve mucus viscoelastic properties (Ferrera et al., 2021; Gomez et al., 2020), restore bacterial killing (Pezzulo et al., 2012), and impede the growth and biofilm formation of pulmonary bacterial pathogens (Dobay et al., 2018).

Highly effective CFTR modulator therapy (HEMT) enables partial F508del-CFTR functional restoration. Triple combination HEMT combines 2 corrector molecules, elexacaftor (VX-445) and tezacaftor (VX-661), to process misfolded F508del-CFTR protein to the cell membrane and a potentiator, ivacaftor (VX-770), to increase channel opening. Phase 3 clinical trials with Elexacaftor/Tezacaftor/Ivacaftor (ETI) have shown dramatic improvement in lung disease and a strong positive impact on quality of life for patients carrying at least one F508del-CFTR allele (Middleton et

al., 2019). This involves an improvement of CFTR-dependent  $\text{Cl}^-$  transport, resulting in a better hydration of airway secretions (Morrison et al., 2022). Interestingly, Rehman and collaborators showed that ETI induced an increase in pH but this was observed only in the context of inflammation with addition of  $\text{TNF-}\alpha$ +IL-17 to the CF epithelium (Rehman et al., 2021, 2020). The failure of F508del-CFTR correction to improve pH value in the absence of inflammation was unexpected and suggested that CFTR-dependent  $\text{HCO}_3^-$  secretion and its role in ASL pH control was dependent of the inflammatory status.

These studies however relied on ASL pH variation, which involves both transepithelial  $\text{HCO}_3^-$  and  $\text{H}^+$  flux. To dissect the role of CFTR on pH homeostasis, and the potential impact of CFTR correction in the CF lung environment we characterized  $\text{HCO}_3^-$  transepithelial flux and ASL pH changes in healthy and CF epithelium, and evaluated the impact of F508del-CFTR rescue in the context of inflammation.

### 3. Results

#### 3.1. VX-445/661/770 increases CFTR $\text{HCO}_3^-$ flux

pH-stat experiments enabled to quantify the  $\text{HCO}_3^-$  secretion rate. Reference  $\text{HCO}_3^-$  secretion rates in Wild Type (WT) respiratory epithelium are shown in Figure 1 and Table 1 Supplemental. Basal secretion rate across WT respiratory cells ( $0.24 \pm 0.04 \mu\text{Eq}\cdot\text{h}^{-1}\cdot\text{cm}^{-2}$ ) was increased by forskolin (Fsk)/M3-isobutyl-1-methylxanthine (IBMX)+Genistein (up to  $0.51 \pm 0.04 \mu\text{Eq}\cdot\text{h}^{-1}\cdot\text{cm}^{-2}$ ) with subsequent complete inhibition by Inh-172.

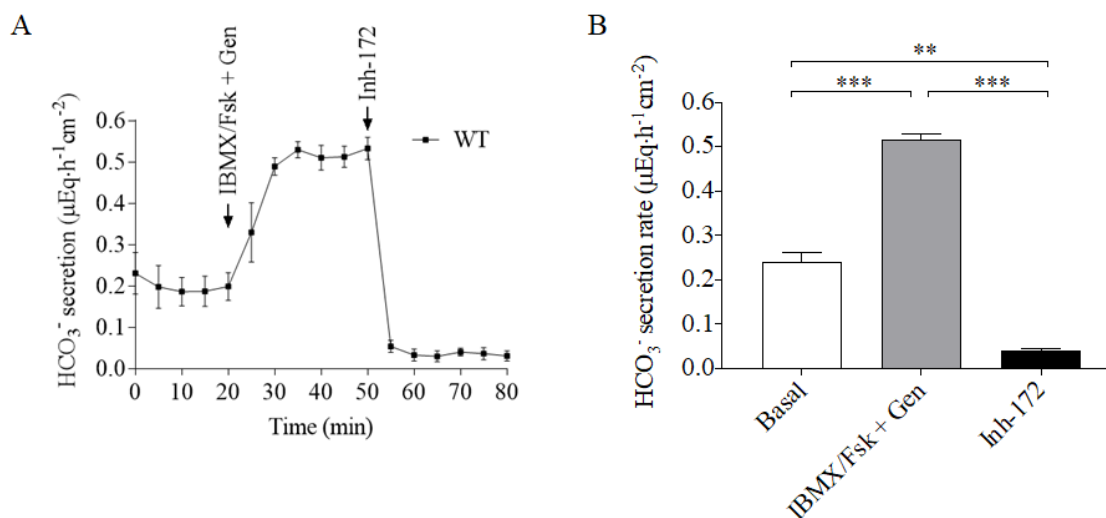

**Figure 1. Bicarbonate secretion in respiratory epithelium expressing WT CFTR.**

$\text{HCO}_3^-$  flux is measured in WT human respiratory epithelium by pH-stat in the presence of amiloride (Basal) and after successive addition of Fsk/IBMX (10  $\mu\text{M}$ /100  $\mu\text{M}$ ) + Genistein (Gen) (100  $\mu\text{M}$ ) and Inh-172 (10  $\mu\text{M}$ ).

(A) Representative tracing (B) Summary of 5 experiments. Results are presented as Mean  $\pm$  SD (n=5). Comparison by Wilcoxon matched-pairs signed rank test. \*\*p< 0.01; \*\*\*p< 0.001.

Representative tracings of HCO<sub>3</sub><sup>-</sup> fluxes in F508del human respiratory epithelial cells in DMSO and VX-445/661/770 conditions are shown in **Figure 2 Panel A**. Control DMSO treated airway epithelia displayed no HCO<sub>3</sub><sup>-</sup> secretion neither at basal state nor after CFTR activation by Fsk/IBMX + Genistein. In contrast, VX-445/661/770 treatment elevated basal HCO<sub>3</sub><sup>-</sup> secretion reaching 78 $\pm$ 12% (0.18  $\pm$  0.03  $\mu$ Eq h<sup>-1</sup> cm<sup>-2</sup>) of the secretion level observed in WT human respiratory epithelial cells (**Figure 2, Panel A and B**). The addition of Fsk/IBMX+Genistein increased CFTR dependent HCO<sub>3</sub><sup>-</sup> secretion up to 70  $\pm$ 29% of the WT level (**Figure 2 Panel A and C, Table 2 Supplemental**). Inh-172 completely inhibited this HCO<sub>3</sub><sup>-</sup> secretion, providing evidence that it was due to CFTR (**Figure 2 Panel A and D, Table 5 Supplemental**). There was no significant difference in HCO<sub>3</sub><sup>-</sup> secretion rates between homozygous and heterozygous F508del cells (**Figure 2 Panel B,C,D, and Table 1 Supplemental**).

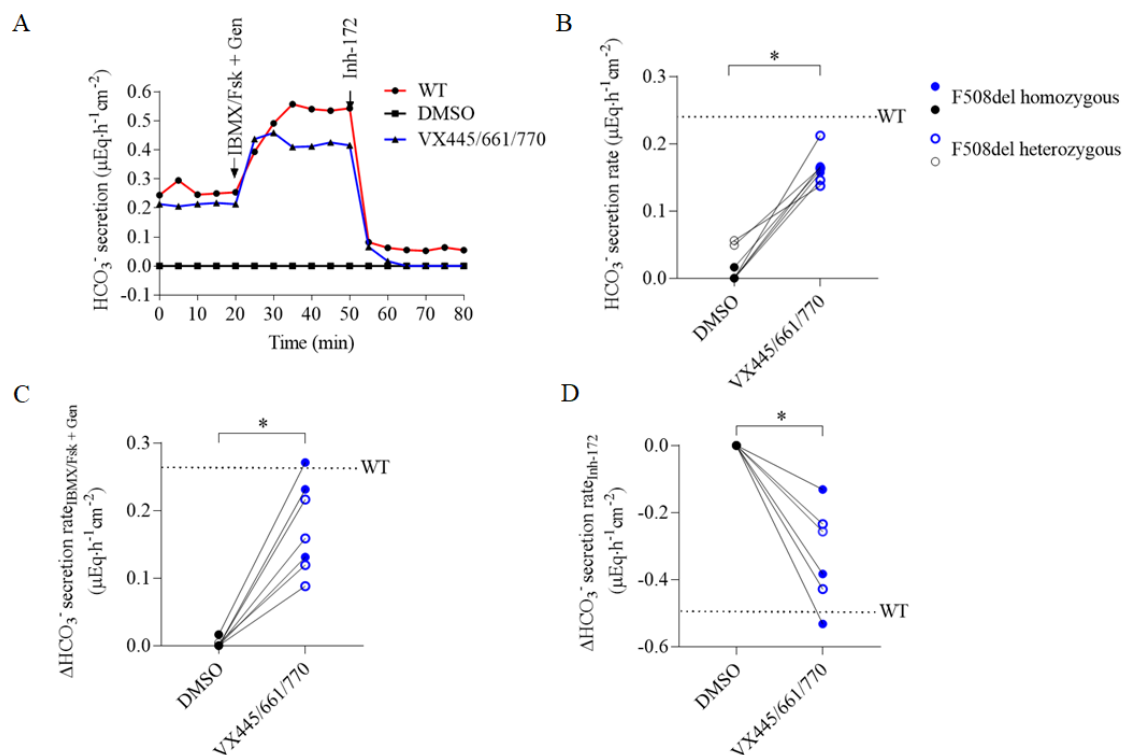

**Figure 2. VX-445/661/770 increases F508del CFTR bicarbonate secretion in respiratory epithelial cells.**

HCO<sub>3</sub><sup>-</sup> fluxes measured in WT and F508del airway epithelia by pH-stat at baseline in the presence of amiloride (Basal) and after successive addition of Fsk/IBMX (10  $\mu$ M/100  $\mu$ M) + Genistein (Gen) (100  $\mu$ M) and Inh-172 (10  $\mu$ M). Tracings were recorded in WT cells (red) and CF cells after a 48-hour incubation with DMSO (black) or VX-445 (3  $\mu$ M)/VX-661 (3  $\mu$ M)/VX-770 (100 nM) (blue).

(A) Representative tracing of pH-stat experiment of human respiratory epithelial cells from a healthy control and a patient carrying homozygous F508del mutation.

(B) Individual basal HCO<sub>3</sub><sup>-</sup> secretion rate changes in presence of Amiloride (100  $\mu$ M) between DMSO and VX-445/661/770 treated human respiratory epithelial cells (n=8). Dotted line represents the mean baseline secretion

rate of WT cells. F508del homozygous human respiratory epithelial cells represented as full circles, heterozygous cells as open circles.

(C) Individual  $\text{HCO}_3^-$  secretion rate changes in response to Fsk/IBMX+ Genistein after a 48-hour incubation of human respiratory epithelial cells (n=7) with DMSO or VX-445/661/770. Dotted line represents the mean of WT secretion rate change.

(D) Individual  $\text{HCO}_3^-$  secretion rate changes in response to Inh-172 after a 48-hour incubation of human respiratory epithelial cells (n=7) with DMSO or VX-445/661/770. Dotted line represents the mean of WT secretion rate change.

Comparison by Wilcoxon matched-pairs signed rank test. \*  $p < 0.05$

### 3.2. Inflammation enhances CFTR $\text{HCO}_3^-$ transport correction in F508del human respiratory epithelial cells

We next investigated the effect of inflammation alone and in combination with VX-445/661/770 on  $\text{HCO}_3^-$  secretion (Figure 3, Table 2 Supplemental). Incubation with IL-17/TNF- $\alpha$  increased  $\text{HCO}_3^-$  secretion above the WT level at basal state (comparison with WT, NS) (Figure 3 Panel A and B, Table 2 Supplemental). The change after stimulation by Fsk/IBMX + Genistein was up to  $87 \pm 41\%$  of the WT (Figure 3 Panel A and C, Table 2 Supplemental).  $\text{HCO}_3^-$  flux was partially inhibited by Inh-172, and complete inhibition was achieved by the subsequent addition of YS-01 (SLC26A4 inhibitor) and GlyH-101 (respective part in the inhibition of Inh-172, YS-01 and GlyH-101 :  $37 \pm 2\%$ ;  $33 \pm 1.5\%$ ;  $29 \pm 1\%$ ) (Figure 3 Panel A and D, Table 2 Supplemental).

The combination of VX-445/661/770 with TNF- $\alpha$  and IL-17 did not modify the basal  $\text{HCO}_3^-$  secretion rate or the cAMP activated  $\text{HCO}_3^-$  flux, as compared to TNF- $\alpha$ /IL-17 alone. In contrast,  $\text{HCO}_3^-$  flux inhibition was increased, mainly the Inh-172 response ( $p < 0.05$ ) (respective part in the inhibition of Inh-172, YS-01 and GlyH-101 :  $45 \pm 2\%$ ;  $29 \pm 6\%$ ;  $26 \pm 1.5\%$ ).

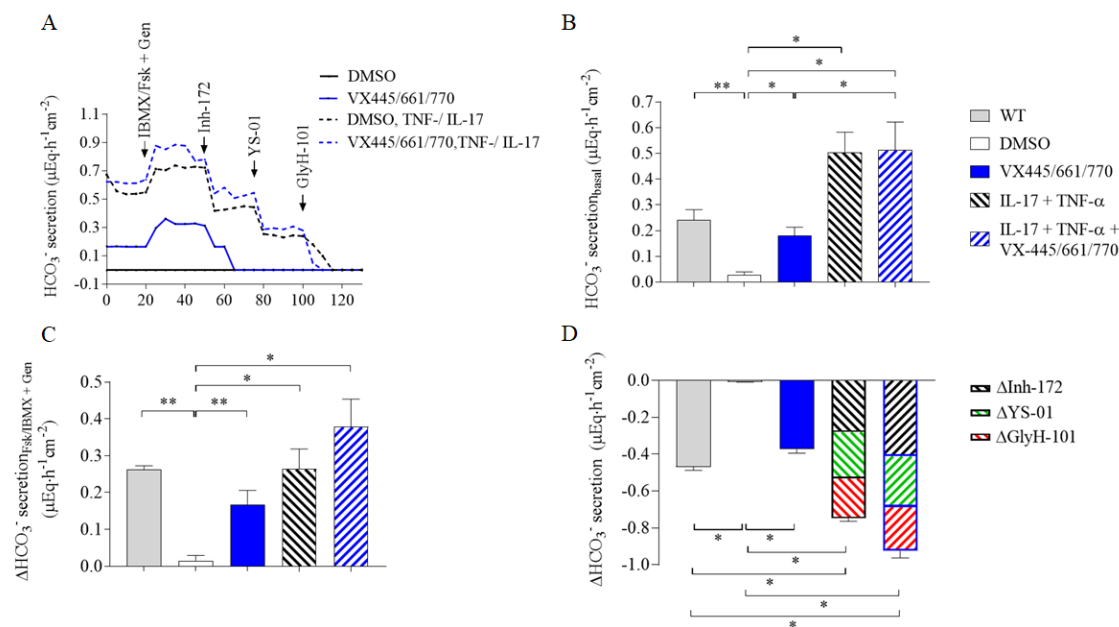

**Figure 3. Inflammation increases bicarbonate transport in human respiratory epithelial cells**

$\text{HCO}_3^-$  flux measured in WT and F508del human respiratory epithelial cells by pH-stat at baseline in the presence of amiloride (Basal) and after successive addition of Fsk/IBMX ( $10\mu\text{M}/100\mu\text{M}$ ) + Genistein ( $100\mu\text{M}$ ) and Inh-172

(10  $\mu$ M), YS-01 (5 $\mu$ M) and GlyH-101 (10 $\mu$ M). CF epithelia were from 2F508del homozygous patients and 2 F508del patients *in trans* with a minimal function mutation (R560K and 1717+1G>T).

Tracings were recorded after a 48-hour incubation with DMSO (black line), VX-445(3 $\mu$ M)/VX-661(3 $\mu$ M)/VX-770(100 nM) (blue plain line), TNF- $\alpha$ (10ng/mL)/IL-17(20ng/mL) (black dashed line) and TNF- $\alpha$ /IL-17 + VX-445/661/770 (blue dashed line).

(A) Representative tracing of pH-stat experiment of human respiratory epithelial cells from a F508del homozygous patient.

(B) Basal HCO<sub>3</sub><sup>-</sup> secretion in WT and CF human respiratory epithelial cells after 48-hours incubation with DMSO, VX-445/661/770, TNF- $\alpha$ /IL-17 and TNF- $\alpha$ /IL-17 + VX-445/661/770.

(C) HCO<sub>3</sub><sup>-</sup> secretion rate changes in response to Fsk/IBMX + Genistein in WT and CF human respiratory epithelial cells after 48-hour incubation in DMSO, VX-445/661/770, TNF- $\alpha$ /IL-17 and TNF- $\alpha$ /IL-17 + VX-445/661/770.

(D) HCO<sub>3</sub><sup>-</sup> secretion rate changes after Fsk/IBMX + Genistein inactivation in response to Inh-172 (black lines), YS-01 (green lines) and GlyH-101 (red lines) in WT and CF human respiratory epithelial cells after 48-hour incubation in DMSO, VX-445/661/770, TNF- $\alpha$ /IL-17 and TNF- $\alpha$ /IL-17 + VX-445/661/770.

Comparison by Mann Whitney signed rank test for WT *versus* CF cells and Wilcoxon matched-pairs signed rank test for comparisons between CF cells. p-value as follows: \* p < 0.05; \*\* p < 0.01; other comparisons were not significant

### 3.3. Inflammation but not VX-445/661/770 alone induce ASL pH alkalinization

VX-445/661/770 did not significantly change ASL pH in comparison to DMSO control conditions (from 7.12(0.11) to 7.14(0.11)) (Figure 4 Panel A). In contrast, TNF- $\alpha$  and IL-17 significantly increased ASL pH to 7.37(0.04) (p=0.009) as shown in Figure 4 Panel A. The combination of VX-445/661/770 with TNF- $\alpha$ /IL-17 induced a further small but significant change in ASL pH to 7.39(0.01) (p=0.03), similar to values observed in WT cells (Simonin et al, 2019).

To investigate the respective role of CFTR and SLC26A4 in pH homeostasis, we performed ASL pH measurements in Cl<sup>-</sup> free solutions where SLC26A4 activity was abrogated. Under these conditions, ASL pH of DMSO treated F508del airway cells was not significantly modified (7.12 vs 7.14 in Cl<sup>-</sup> conditions) while it significantly increased from 7.14(0.11) to 7.28(0.12) when the cells were incubated with VX-445/661/770, thus unmasking a CFTR-dependent pH correction (Figure 4 Panel B). In pro-inflammatory conditions, ASL pH was significantly increased up to 7.34 (0.08) (p=0.0023 *versus* DMSO but NS *versus* VX-445/661/770), with an additional effect of VX-445/661/770 reaching values similar as those obtained in physiological conditions (7.38(0.07)).

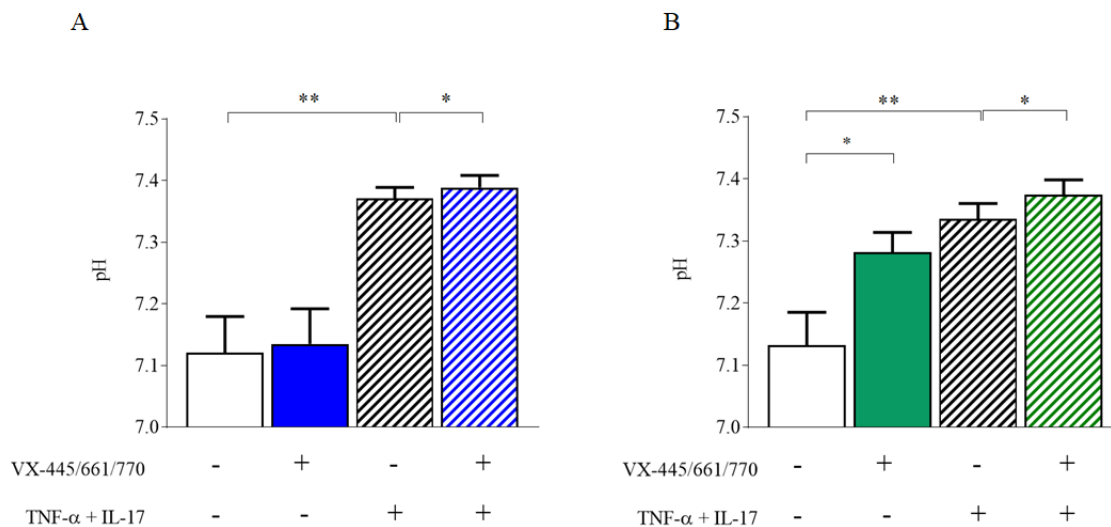

**Figure 4. Airway surface liquid (ASL) pH of F508del human respiratory epithelial cells is abnormally acidic and is increased by VX-445/661/770 and TNF-α+IL-17 combination**

ASL pH of human respiratory epithelial cells was measured in physiological conditions (37°C, 5% CO<sub>2</sub>) after an 8-hour apical incubation of 50μL physiological Ringer's solution (A) or Cl<sup>-</sup>-free Ringer's solution (B).

(A) ASL pH assessed in physiological conditions in human respiratory epithelial cells from F508del homozygous patients in control DMSO conditions (n=4) versus VX-445/661/770 (n=4); IL-17+TNF-α (n=6); IL-17+TNF-α + VX-445/661/770 (n=6).

(B) ASL pH assessed in Cl<sup>-</sup>-free conditions in human respiratory epithelial cells from F508del homozygous patients in control DMSO conditions (n=9) versus VX-445/661/770 (n=15), IL-17+TNF-α (n=9), IL-17+TNF-α + VX-445/661/770 (n=8).

Data are presented as mean ± S.D. Comparison by Wilcoxon matched-pairs signed rank test p-value as follows: \* p < 0.05; \*\* p < 0.01.

#### 3.4. Inflammation increases CFTR and SLC26A4 expression

VX-445/661/770 did not modify the transcript levels of *CFTR*, *SLC26A4*, *SLC26A9* or *NBCe1* (Figure 5).

TNF-α/IL-17 incubation increased *SLC26A4* transcript levels by more than 40-fold (p < 0.001), but in contrast *CFTR* transcript levels only by 1.5-fold (p < 0.01), while it did not significantly change *NBCe1* transcript levels. For *SLC26A9*, there was a trend for increase of the transcript level upon TNF-α/IL-17, however, this did not reach the significant level (Figure 5).

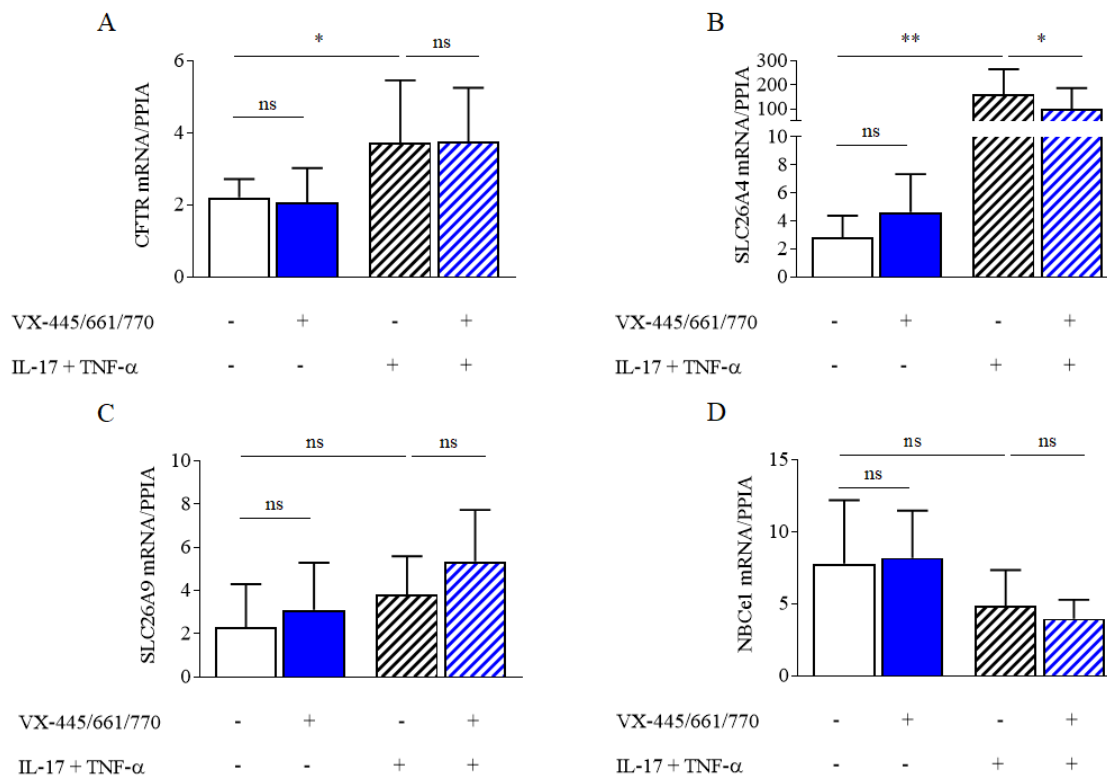

**Figure 5. Main bases transporters expression in primary F508del/F508del human respiratory epithelial cells by RTqPCR**

Transcript expression levels of *CFTR* (A), *SLC26A4* (Pendrin) (B), *SLC26A9* (C) and *NBCe1* (D) were analysed using real-time RT-PCR in ALI differentiated primary human bronchial epithelial cells from F508del homozygous patients. Transcript levels were analysed in control DMSO condition (n=8, full white bars), VX-445/661/770 (n=4, full blue bars), IL-17+TNF- $\alpha$  (n=8, Stripped white bars), IL-17+TNF- $\alpha$  + VX-445/661/770 (n=8, striped blue bars) and normalized with cyclophilin transcript (*PPIA*) as an internal control. When indicated, cells were treated with IL-17 (20 ng/mL) and TNF- $\alpha$  (10 ng/mL) and/or, VX-770 (100nM), VX-445 (3 $\mu$ M) and VX-661 (3 $\mu$ M) for 48h. Data are presented as mean  $\pm$  S.D. and statistical analysis is performed with Wilcoxon matched-pairs signed rank test (\*  $P < 0.05$ , \*\*  $P < 0.01$ ; ns: non significant).

#### 4. Discussion

There are still few pharmacological data on rescue of HCO<sub>3</sub><sup>-</sup> secretion by CFTR correction in CF airway epithelium. Our results show that F508del-CFTR correction by VX-445/661/770 rescues HCO<sub>3</sub><sup>-</sup> transport up to 80% of the normal level in primary cultures of airway epithelium. Inflammation, e.g. the TNF $\alpha$ /IL-17 cocktail, massively increases HCO<sub>3</sub><sup>-</sup> transport, involving both CFTR and SLC26A4. CFTR correction in the context of inflammation further increased HCO<sub>3</sub><sup>-</sup> secretion by CFTR. Strikingly, the increase in CFTR-mediated HCO<sub>3</sub><sup>-</sup> secretion had a marginal impact on ASL pH, in contrast to TNF- $\alpha$ /IL-17 induced inflammation.

**F508del CFTR correction restores HCO<sub>3</sub><sup>-</sup> transport but not ASL pH**



Similar observations were recently reported in intestinal F508del organoids where VX-445/661/770 induced an increase in CFTR-dependent  $\text{HCO}_3^-$  transport (Bijvelds et al., 2022; Ciciriello et al., 2022) and in D1152H primary respiratory cells where ivacaftor improved selective  $\text{HCO}_3^-$  transport defect (Laselva et al., 2020). Interestingly, in these reports as in our study, carrying F508del on both alleles did not increase the level of  $\text{HCO}_3^-$  transport correction, in comparison to carrying F508del on a single allele. All these results were obtained from short circuit currents in  $\text{Cl}^-$  free medium, which only enables to indirectly assess  $\text{HCO}_3^-$  transport by assessing the transepithelial potential difference. Here, by using the pH-stat titration system, a powerful technique which maintains a constant pH of apical compartments as hydrogen ions are consumed by  $\text{HCO}_3^-$  secretion, we demonstrate that VX-445/661/770 treatment increases transepithelial  $\text{HCO}_3^-$  fluxes. The increase of secretion in response to forskolin+genistein and its complete inhibition by Inh-172 indicates that this effect is due to CFTR. Nevertheless, despite this massive increase in CFTR-dependent  $\text{HCO}_3^-$  transepithelial transport, the effect of F508del-CFTR rescue on ASL pH of cultured airway epithelia was marginal. This confirms the observations by Rehman and Morrison (Morrison et al., 2022; Rehman et al., 2021) and provides evidence that correction of the CFTR channel defect alone is not sufficient to buffer acidic ASL of CF airways. In contrast, Ludovico et al. showed that VX445/661/770 alkalinized the pH to WT levels (Ludovico et al., 2022). The reason of this discrepancy is unclear but may be related to differences in media culture and differential expression of  $\text{HCO}_3^-$  transporters (Livnat et al., 2023).

#### **Functional interplay between CFTR and SLC26A4**

Airway inflammation is a hallmark of CF disease observed from the first days of life, mainly driven by neutrophilic inflammation and various cytokines such as  $\text{TNF-}\alpha$  and IL-17 (Lukacs et al., 1995; Sly et al., 2013; Tan et al., 2011).  $\text{TNF}\alpha/\text{IL-17}$  inflammatory cytokines combination not only modulate innate anti-infective defense (McAleer and Kolls, 2011), but our data point to a massive increase of  $\text{HCO}_3^-$  secretion both at basal state and after CFTR activation by cAMP (Fsk/IBMX). In addition, pH-stat experiments enabled us to dissect the participation of other transporters in ASL pH homeostasis. They clearly discriminated SLC26A4 electroneutral  $\text{Cl}^-/\text{HCO}_3^-$  exchange, as the complete inhibition of  $\text{HCO}_3^-$  flux required the subsequent addition of YS-01 SLC26A4 inhibitor (Lee et al., 2020) and GlyH-101. This proinflammatory condition was associated with pH normalization of F508del ASL. Our results are consistent with Rehman's observations (Rehman et al., 2020) indicating SLC26A4 as a key player in CF ASL alkalinization, and the recent publication of Guidone et al. showing that YS-01 significantly decreased ASL pH in both CF and non-CF epithelia treated with IL-17/ $\text{TNF-}\alpha$  (Guidone et al., 2022). However, in contrast to our studies, Guidone et al. observed significant ASL pH alkalinization only after stimulation of IL-17/ $\text{TNF-}\alpha$  treated cells by isoproterenol (Guidone et al., 2022). This discrepancy might be related to cell culture media that impact on gene expression and activity of ion channels (Saint-

Criq et al., 2020). As TNF- $\alpha$ /IL-17 increase SLC26A4 and CFTR transcript expression, one could hypothesize that the modification of pH, driven by inflammation, could be related to SLC26A4 activity, both directly by increasing HCO<sub>3</sub><sup>-</sup> secretion by SLC26A4 and CFTR, and indirectly via its functional coupling to corrected F508del CFTR which would fuel SLC26A4 with Cl<sup>-</sup> (Garnett et al., 2011; Kim et al., 2019). SLC26A4 appears therefore as a key player of pH homeostasis in inflammatory physiological conditions. However, the observation that correction of CFTR further increases HCO<sub>3</sub><sup>-</sup> secretion by CFTR in inflammatory conditions, and that pH is significantly increased in Cl<sup>-</sup>-free SLC26A4 defective conditions unravels the role of CFTR in ASL pH homeostasis.

The fact that GlyH-101 was necessary to completely inhibit the HCO<sub>3</sub><sup>-</sup> transport in the context of inflammation suggests that additional HCO<sub>3</sub><sup>-</sup> transporters other than CFTR and SLC26A4 may be involved in this inflammation-induced alkalinization (Liu et al., 2022; Zajac et al., 2021). Indeed, while Inh-172 is reported as being very specific of the CFTR gating (Caci et al., 2008), GlyH-101 occludes the CFTR pore, but is also active on Anoctamin, bestrophin (Bai et al., 2021), voltage gated channels (Lin et al., 2023) and SLC26A9 (Bertrand et al., 2009; Liu et al., 2022). It is still debated whether SLC26A9 contributes to HCO<sub>3</sub><sup>-</sup> secretion directly as suggested by a recent study on perfused mouse bronchioles and nasal cells (Jo et al., 2022; Liu et al., 2022) or via reciprocal regulation with CFTR, as suggested by the observation that correction of F508del-CFTR also restored SLC26A9 constitutive activity in airway cells (Bertrand et al., 2017, 2009; Larsen et al., 2021). Our experiments show that SLC26A9 transcripts are present in airways and display a trend to increase upon inflammatory trigger, however at a not significant level. This increase may be responsible for stabilization of corrected F508del-CFTR at the plasma membrane as shown by Pinto et al. (Pinto et al., 2021) and thus contribute indirectly to the higher HCO<sub>3</sub><sup>-</sup> fluxes mediated by CFTR observed in pH-stat experiments (Balázs and Mall, 2018).

### **Physiopathological relevance of our findings**

Altogether, our results suggest that, in physiological conditions, SLC26A4 is the main driver of pH regulation in the bronchial epithelium, CFTR intervening indirectly by fueling the exchanger with Cl<sup>-</sup>. Nevertheless, CFTR HCO<sub>3</sub><sup>-</sup> secretion may be required in specific acidic situations, such as gastric acid inhalation, to efficiently and rapidly buffer the ASL pH. This has been shown in murine duodenum where low luminal pH activates transcellular HCO<sub>3</sub><sup>-</sup> transport that requires CFTR (Hogan et al., 1997). While a proinflammatory trigger considerably increases HCO<sub>3</sub><sup>-</sup> flux, it does not increase pH to physiological values. Indeed, apart from pH regulation, restoration of physiological levels of HCO<sub>3</sub><sup>-</sup> into the airway microenvironment, by a proximal paracrine effect, would also favor rapid mucin expansion, resulting in improved mucociliary clearance and decreased airway obstruction and inflammation (Quinton, 2008). Downstream effects could also restore intrinsic immune defenses by

augmenting formation of neutrophil extracellular traps by neutrophils and sensitization of *P. aeruginosa* to the antimicrobial peptide cathelicidin LL-37(Siew et al., 2022).

These results suggest that a full efficiency of CFTR modulation might require a residual “background” of CFTR inflammation. This is consistent with *in vivo* studies which showed that nasal mucosa pH was abnormally acidic in CF neonates but normal from 3 months of age after airway inflammation initiation(Abou Alaiwa et al., 2014; Schultz et al., 2017) and a positive correlation between level of airway inflammation and the respiratory improvement in G551D patients treated with ivacaftor reported by Rehman et al.(Rehman et al., 2021). Several studies report that CFTR modulators abrogate airway inflammation which may then jeopardize the effect on pH(Lepissier et al., 2023). Physiopathological relevance of these findings including their long term remanence is still unclear(Hisert et al., 2017).

### Study limitation

This study has limitations. First, we measured ASL pH by a pH electrode and assumed that the 50  $\mu$ l Ringer solution added at the surface of airway cultures for the experiment would represent diluted ASL. However, this Ringer contains 25 mM  $\text{HCO}_3^-$  and could buffer small pH variations, and thus underestimate pH changes. Second, inflammation is a complex status involving different triggers, which may behave differently(Rehman and Welsh, 2023; Roesch et al., 2018). Moreover, the concentration of cytokines used in this experiment might be far above those occurring *in vivo*. Indeed, we performed a pilot study to assess inflammatory cytokines in sputum and observed that TNF- $\alpha$  levels were 100-fold lower in patients’ sputum than the concentration applied *in vitro*(Lepissier et al., 2023). Third, our experimental design only enabled to mimic acute inflammation. It could be that CFTR rescue may differentially modulate CF epithelia subjected to chronic inflammation. Finally, ASL acid-base regulation is a very complex phenomenon involving the coordinated activity of all ion transporting proteins, including  $\text{H}^+$  transporting proteins present on apical and basolateral sides of the epithelium(Zajac et al., 2021). The measurement of ASL pH cannot discriminate between increase in base secretion and reduction of acid secretion(Shah et al., 2016). Regulation of ATP12A proton pump by inflammation as recently reported by Guidone et al. showed that impact on  $\text{H}^+$  secretion needs to be considered. Most importantly, our experiments measure global luminal pH and  $\text{HCO}_3^-$  transport but may underestimate local pH modification in micro areas around submucosal glands, which express CFTR at a high level and display acidic pH environment, related to CFTR defect(Garnett et al., 2016). Local correction of  $\text{HCO}_3^-$  secretion may be very relevant to act on inflammation mediated mucus viscosity.

### 5. Conclusions

Our data show that CFTR correction restores  $\text{HCO}_3^-$  secretion but at a level which is not sufficient to overcome ASL pH acidosis. Inflammation is a key regulator of  $\text{HCO}_3^-$  secretion in CF airways and enhances the efficacy of CFTR modulators. Prediction of the response by therapy should take into account airway inflammatory phenotype and its effect on ASL pH.

## Materials and Methods

### 2.1. Patients

CF patients and healthy subjects (WT) were recruited for respiratory airway cell sampling (Clinical Trials: NCT02965326). The study was approved by the Ile de France 2 Ethics Committee, and written, informed consent was obtained from each adult and from both parents for participants below 18 (AFSSAPS (ANSM) B1005423-40, n° Eudract 2010-A00392-37; CPP IDF2: 2010-05-03-3).

### 2.2. Cell culture

Human bronchial epithelial cells were isolated from bronchial explants (1-2 bifurcation) by enzymatic digestion as previously described (Golec et al., 2022). Cells were first grown in T75cm<sup>2</sup> flasks, in DMEM/F-12 cell culture medium supplemented with 10% newborn calf serum, Rho kinase inhibitor Y-27632 (10μM), Piperacillin/Tazobactam 90μg/10μg/ml, Colimycin 16μg/mL and Amphotericin B 5μg/mL, and additional growth factors. For air-liquid interface (ALI) culture 350,000 human respiratory airway expanded cells suspended in amplification medium were seeded on type IV collagen-coated porous filter with a 0.33 cm<sup>2</sup> surface (6.5mm diameter, 0.4μm pore size, Corning, Tewksbury, MA). UG2% medium (DMEM/F-12, supplemented with 2% Ultrosor G) containing antibiotics as above, was added to the basal side of filters. After 72 hours of liquid/liquid interface, apical media was removed and cells were cultured in ALI with UG2% basal medium changed every 48-72 hours for 3-4 weeks to establish a differentiated epithelium. Transepithelial electrical resistance (RT) of cultures was measured with a chopstick voltmeter (Millicell-ERS).

Prior functional studies, cells were incubated at the basolateral side for 48 hours with DMSO 0.03% (referred as control condition), or VX-770 (100nM), VX-445 (3μM) and VX-661 (3μM), referred as VX-445/661/770 (Selleckchem) all dissolved in DMSO. To assess inflammation-induced responses, epithelia were treated at the basolateral side with 10ng/ml TNF-α (R&D Systems) and 20ng/ml IL-17 (R&D Systems) for 48 hours.

### 2.3. Measurement of $\text{HCO}_3^-$ fluxes

To investigate the  $\text{HCO}_3^-$  transepithelial transport,  $\text{HCO}_3^-$  secretion rates were monitored in Ussing chambers under open-circuit conditions by the pH-stat method. A mini pH electrode connected to Automated titration workstation, temperature sensor and burette (all from Radiometer Analytical) introduced to mucosal chamber were used to automatically titrate 5 mM HCl to maintain the pH of solution at  $7.000 \pm 0.005$ . TitraMaster 85 Software was used to control the rate of titration, amount of

titrant added and continuous measurement of solution pH. The rate of  $\text{HCO}_3^-$  secretion [ $\mu\text{Eq}\cdot\text{h}^{-1}\cdot\text{cm}^{-2}$ ] was calculated in 5 minute intervals by noting the amount of titrant added, its concentration and the cell surface area.  $\text{HCO}_3^-$  secretion rates were calculated 20-40 minutes after addition of each activator/inhibitor and considered stable when remaining constant for at least 15 minutes. Solutions composition used for pH-stat measurements are provided in **Table 3Supplemental**. Apical solution was vigorously bubbled with pure  $\text{O}_2$ , while basolateral solution was bubbled with carbogen (95%  $\text{O}_2$ , 5%  $\text{CO}_2$ ). The  $\text{HCO}_3^-$  secretion rates were monitored in the presence of ENaC-channel blocker Amiloride (100 $\mu\text{M}$ , Spectrum Chemical) (basal secretion rate) and after subsequent addition of activators or inhibitors of ion transporting proteins to determine their involvement in  $\text{HCO}_3^-$  transport across epithelium. This included: cAMP agonists Forskolin (Fsk) (10 $\mu\text{M}$ , Sigma), M3-isobutyl-1-methylxanthine (IBMX) (100 $\mu\text{M}$ , Sigma-Aldrich Merck) and Genistein (10 $\mu\text{M}$ , Sigma-Aldrich Merck) to activate and potentiate CFTR activity; the specific CFTR inhibitor Inh-172 (10 $\mu\text{M}$ , Sigma-Aldrich Merck), and in case of remaining  $\text{HCO}_3^-$  flux, the SLC26A4 inhibitor YS-01 (5 $\mu\text{M}$ , Aobious) and GlyH-101 (10 $\mu\text{M}$ , Sigma-Aldrich Merck). This allowed to evaluate the cAMP activated  $\text{HCO}_3^-$  flux (Fsk/IBMX+Genistein) and its inhibition by Inh-172, GlyH-101 and YS-01. As CFTR may be partially activated at basal state, the change after CFTR inhibition was considered as the index of CFTR activity.

#### 2.4. Measurement of ASL pH

In order to measure ASL pH under physiological conditions, we designed a system with a controlled atmosphere enclosure enabling to maintain humidity,  $\text{pCO}_2$  at 5%, and temperature at 37°C as previously described (Simonin et al., 2019). As ASL layer was too thin to allow direct and reproducible measurement of pH without risking disruption, pH was measured after addition of 50 $\mu\text{L}$  solution at the cells monolayer's apical side. Solutions composition used for physiological condition and  $\text{Cl}^-$  free condition are provided in **Table 4Supplemental**. This 50 $\mu\text{L}$  solution, representing diluted ASL, was harvested after 8 hours of incubation, and pH was measured immediately, directly in the controlled atmosphere enclosure with a micro-combination pH-electrode (Thermo Scientific Orion 9810BN, Illkirch, Grand Est, France). Prior to each experiment, pH microelectrode was calibrated with pH 4 and pH 7 buffers. Experimental solutions were equilibrated at pH 7.4. We previously showed that in this set-up, the measured pH value did not differ by more than 0.03 pH unit from the theoretical one calculated according to the Henderson-Hasselbalch equation (Simonin et al., 2019).

#### 2.5. RT-PCR, genetic analysis

200ng of total RNA was reverse-transcribed (Thermo Fischer Scientific). Real-time quantitative PCR was performed on a LightCycler (Roche Diagnostics) with the LightCyclerFastStart DNA Master SYBR Green 1 kit (Roche Diagnostics) according to the manufacturer's protocols, except that the reaction volume was reduced 2.5-fold. Specific primers were designed using Primer 3 (free online software,

**Table 5 Supplemental).** In each run, a standard curve was obtained using serial dilution of stock cDNA prepared from the mix of the different samples total RNA. The expression of the of CFTR, SLC26A4, NBCE1 and SLC26A9 transcripts was normalized to the Cyclophilin-A (PPIA) expression (mean threshold cycle for PPIA = 27.5±0.1).

#### 2.6. Statistical analysis

Statistical analysis was performed using GraphPad Prism® software. Data are presented as mean ± (SD). Comparisons were performed with Wilcoxon matched-pairs signed rank test or Mann-Whitney as appropriate. Correlations were assessed with Spearman test. Significant value was retained if  $p < 0.05$ .

#### Supplementary Materials:

This manuscript has supplementary information

#### Funding:

This research was funded by Vertex Innovation Award-2017 cycle. Association ABCF, Vaincre La Mucoviscidose - RC20200502648-2020 Award, Mirosław Zajac was financed by the Polish National Agency for Academic Exchange within Bekker Program no. BPN/BEK/2021/1/00284 and by National Science Center (NCN) Poland no. 2019/35/B/NZ1/02546.

#### Conflicts of Interest:

I Sermet-Gaudelus (ISG) is principal investigator of Vertex initiated studies  
ISG, Luis Galiotta, Gilles Crambert and Gabrielle Planelles declare academic grant funded by Vertex Innovation Award.

#### References:

- Abou Alaiwa MH, Beer AM, Pezzulo AA, Launspach JL, Horan RA, Stoltz DA, Starner TD, Welsh MJ, Zabner J. 2014. Neonates with cystic fibrosis have a reduced nasal liquid pH; A small pilot study. *J Cyst Fibros* **13**:373–377. doi:10.1016/j.jcf.2013.12.006
- Bai W, Liu M, Xiao Q. 2021. The diverse roles of TMEM16A Ca<sup>2+</sup>-activated Cl<sup>-</sup> channels in inflammation. *J Adv Res* **33**:53–68. doi:10.1016/j.jare.2021.01.013
- Balázs A, Mall MA. 2018. Role of the SLC26A9 chloride channel as disease modifier and potential therapeutic target in cystic fibrosis. *Front Pharmacol*. doi:10.3389/fphar.2018.01112

- Bertrand CA, Mitra S, Mishra SK, Wang X, Zhao Y, Pilewski JM, Madden DR, Frizzell RA. 2017. The CFTR trafficking mutation F508del inhibits the constitutive activity of SLC26A9. *Am J Physiol - Lung Cell Mol Physiol*. doi:10.1152/ajplung.00178.2016
- Bertrand CA, Zhang R, Pilewski JM, Frizzell RA. 2009. SLC26A9 is a constitutively active, CFTR-regulated anion conductance in human bronchial epithelia. *J Gen Physiol*133:421–438. doi:10.1085/jgp.200810097
- Bijvelds MJC, Roos FJM, Meijsen KF, Roest HP, Verstegen MMA, Janssens HM, van der Laan LJW, de Jonge HR. 2022. Rescue of chloride and bicarbonate transport by elexacaftor-ivacaftor-tezacaftor in organoid-derived CF intestinal and cholangiocyte monolayers. *J Cyst Fibros*21:537–543. doi:10.1016/j.jcf.2021.12.006
- Bridges RJ. 2012. Mechanisms of bicarbonate secretion: Lessons from the airways. *Cold Spring Harb Perspect Med*2:1–10. doi:10.1101/cshperspect.a015016
- Caci E, Caputo A, Hinzpeter A, Arous N, Fanen P, Sonawane N, Verkman AS, Ravazzolo R, Zegarra-Moran O, Galiotta LJV. 2008. Evidence for direct CFTR inhibition by CFTRinh-172 based on Arg347 mutagenesis. *Biochem J*413:135–142. doi:10.1042/BJ20080029
- Ciciriello F, Bijvelds MJC, Alghisi F, Meijsen KF, Cristiani L, Sorio C, Melotti P, Fiocchi AG, Lucidi V, De Jonge HR. 2022. Theratyping of the Rare CFTR Variants E193K and R334W in Rectal Organoid-Derived Epithelial Monolayers. *J Pers Med*12:632. doi:10.3390/jpm12040632
- Cutting GR. 2015. Cystic fibrosis genetics: from molecular understanding to clinical application. *Nat Rev Genet*16:45–56. doi:10.1038/nrg3849
- Dobay O, Laub K, Stercz B, Kéri A, Balázs B, Tóthpál A, Kardos S, Jaikumpun P, Ruksakiet K, Quinton PM, Zsembery Á. 2018. Bicarbonate inhibits bacterial growth and biofilm formation of prevalent cystic fibrosis pathogens. *Front Microbiol*9:1–12. doi:10.3389/fmicb.2018.02245
- Ferrera L, Capurro V, Delpiano L, Gianotti A, Moran O. 2021. The Application of Bicarbonate Recovers the Chemical-Physical Properties of Airway Surface Liquid in Cystic Fibrosis Epithelia Models. *Biology (Basel)*10:278. doi:10.3390/biology10040278
- Garland AL, Walton WG, Coakley RD, Tan CD, Gilmore RC, Hobbs CA, Tripathy A, Clunes LA, Bencharit S, Stutts MJ, Betts L, Redinbo MR, Tarran R. 2013. Molecular basis for pH-dependent mucosal dehydration in cystic fibrosis airways. *Proc Natl Acad Sci U S A*110:15973–15978. doi:10.1073/pnas.1311999110

- Garnett JP, Hickman E, Burrows R, Hegyi P, Tizslavicz L, Cuthbert AW, Fong P, Gray MA. 2011. Novel role for pendrin in orchestrating bicarbonate secretion in cystic fibrosis transmembrane conductance regulator (CFTR)-expressing airway serous cells. *J Biol Chem* **286**:41069–41082. doi:10.1074/jbc.M111.266734
- Garnett JP, Kalsi KK, Sobotta M, Bearham J, Carr G, Powell J, Brodli M, Ward C, Tarran R, Baines DL. 2016. Hyperglycaemia and *Pseudomonas aeruginosa* acidify cystic fibrosis airway surface liquid by elevating epithelial monocarboxylate transporter 2 dependent lactate-H<sup>+</sup> secretion. *Sci Rep* **6**:37955. doi:10.1038/srep37955
- Golec A, Pranke I, Scudieri P, Hayes K, Dreano E, Dunlevy F, Hatton A, Downey DG, Galietta L, Sermet I. 2022. Isolation, cultivation, and application of primary respiratory epithelial cells obtained by nasal brushing, polyp samples, or lung explants. *STAR Protoc* **3**:101419. doi:10.1016/j.xpro.2022.101419
- Gomez CCS, Parazzi PLF, Clinckspoor KJ, Mauch RM, Pessine FBT, Levy CE, Peixoto AO, Ribeiro MÂGO, Ribeiro AF, Conrad D, Quinton PM, Marson FAL, Ribeiro JD. 2020. Safety, Tolerability, and Effects of Sodium Bicarbonate Inhalation in Cystic Fibrosis. *Clin Drug Investig* **40**:105–117. doi:10.1007/s40261-019-00861-x
- Gorrieri G, Scudieri P, Caci E, Schiavon M, Tomati V, Sirci F, Napolitano F, Carrella D, Gianotti A, Musante I, Favia M, Casavola V, Guerra L, Rea F, Ravazzolo R, Di Bernardo D, Galietta LJV. 2016. Goblet Cell Hyperplasia Requires High Bicarbonate Transport to Support Mucin Release. *Sci Rep* **6**:1–15. doi:10.1038/srep36016
- Guidone D, Buccirosi M, Scudieri P, Genovese M, Sarnataro S, De Cegli R, Cresta F, Terlizzi V, Planelles G, Crambert G, Sermet I, Galietta LJV. 2022. Airway surface hyperviscosity and defective mucociliary transport by IL-17/TNF- $\alpha$  are corrected by  $\beta$ -adrenergic stimulus. *JCI Insight* **7**. doi:10.1172/jci.insight.164944
- Hisert KB, Heltshe SL, Pope C, Jorth P, Wu X, Edwards RM, Radey M, Accurso FJ, Wolter DJ, Cooke G, Adam RJ, Carter S, Grogan B, Launspach JL, Donnelly SC, Gallagher CG, Bruce JE, Stoltz DA, Welsh MJ, Hoffman LR, McKone EF, Singh PK. 2017. Restoring Cystic Fibrosis Transmembrane Conductance Regulator Function Reduces Airway Bacteria and Inflammation in People with Cystic Fibrosis and Chronic Lung Infections. *Am J Respir Crit Care Med* **195**:1617–1628. doi:10.1164/rccm.201609-1954OC
- Hoegger MJ, Fischer AJ, McMenimen JD, Ostedgaard LS, Tucker AJ, Awadalla MA, Moninger TO, Michalski AS, Hoffman EA, Zabner J, Stoltz DA, Welsh MJ. 2014. Impaired mucus detachment



disrupts mucociliary transport in a piglet model of cystic fibrosis. *Science* (80- )**345**:818–822.  
doi:10.1126/science.1255825

Hogan D, Crombie D, Isenberg J, Svendsen P, Schaffalitzky de Muckadell O, Ainsworth M. 1997. Acid-stimulated duodenal bicarbonate secretion involves a CFTR-mediated transport pathway in mice. *Gastroenterology***113**:533–541. doi:10.1053/gast.1997.v113.pm9247473

Jo S, Centeio R, Park J, Ousingsawat J, Jeon D, Talbi K, Schreiber R, Ryu K, Kahlenberg K, Somoza V, Delpiano L, Gray MA, Amaral MD, Railean V, Beekman JM, Rodenburg LW, Namkung W, Kunzelmann K. 2022. The SLC26A9 inhibitor S9-A13 provides no evidence for a role of SLC26A9 in airway chloride secretion but suggests a contribution to regulation of ASL pH and gastric proton secretion. *FASEB J***36**. doi:10.1096/fj.202200313RR

Kim D, Huang J, Billet A, Abu-Arish A, Goepf J, Matthes E, Tewfik MA, Frenkiel S, Hanrahan JW. 2019. Pendrin mediates bicarbonate secretion and enhances cystic fibrosis transmembrane conductance regulator function in airway surface epithelia. *Am J Respir Cell Mol Biol***60**:705–716. doi:10.1165/rcmb.2018-0158OC

Larsen MB, Choi JJ, Wang X, Myerburg MM, Frizzell RA, Bertrand CA. 2021. Separating the contributions of SLC26A9 and CFTR to anion secretion in primary human bronchial epithelia. *Am J Physiol Cell Mol Physiol***321**:L1147–L1160. doi:10.1152/ajplung.00563.2020

Laselva O, Moraes TJ, He G, Bartlett C, Szàrics I, Ouyang H, Gunawardena TNA, Strug L, Bear CE, Gonska T. 2020. The CFTR Mutation c.3453G > C (D1152H) Confers an Anion Selectivity Defect in Primary Airway Tissue that Can be Rescued by Ivacaftor. *J Pers Med***10**:40. doi:10.3390/jpm10020040

Lee EH, Shin MH, Gi M, Park J, Song D, Hyun Y-M, Ryu J-H, Seong JK, Jeon Y, Han G, Namkung W, Park MS, Choi JY. 2020. Inhibition of Pendrin by a small molecule reduces Lipopolysaccharide-induced acute Lung Injury. *Theranostics***10**:9913–9922. doi:10.7150/thno.46417

Lepissier A, Bonnel AS, Wizla N, Weiss L, Mittaine M, Bessaci K, Kerem E, Houdouin V, Reix P, Marguet C, Sermet-Gaudelus I. 2023. Moving the Dial on Airway Inflammation in Response to Trikafta in Adolescents with Cystic Fibrosis. *Am J Respir Crit Care Med***207**:792–795. doi:10.1164/rccm.202210-1938LE

Lin J, Gettings SM, Talbi K, Schreiber R, Taggart MJ, Preller M, Kunzelmann K, Althaus M, Gray MA. 2023. Pharmacological inhibitors of the cystic fibrosis transmembrane conductance regulator exert off-target effects on epithelial cation channels. *Pflügers Arch - Eur J Physiol***475**:167–179.

doi:10.1007/s00424-022-02758-9

- Liu L, Yamamoto A, Yamaguchi M, Taniguchi I, Nomura N, Nakakuki M, Kozawa Y, Fukuyasu T, Higuchi M, Niwa E, Tamada T, Ishiguro H. 2022. Bicarbonate transport of airway surface epithelia in luminally perfused mice bronchioles. *J Physiol Sci***72**:4. doi:10.1186/s12576-022-00828-2
- Livnat G, Meeker JD, Ostmann AJ, Strecker LM, Clancy JP, Brewington JJ. 2023. Phenotypic Alteration of an Established Human Airway Cell Line by Media Selection. *Int J Mol Sci***24**:1246. doi:10.3390/ijms24021246
- Ludovico A, Moran O, Baroni D. 2022. Modulator Combination Improves In Vitro the Microrheological Properties of the Airway Surface Liquid of Cystic Fibrosis Airway Epithelia. *Int J Mol Sci***23**:11396. doi:10.3390/ijms231911396
- Lukacs NW, Strieter RM, Chensue SW, Widmer M, Kunkel SL. 1995. TNF-alpha mediates recruitment of neutrophils and eosinophils during airway inflammation. *J Immunol***154**:5411-7.
- McAleer JP, Kolls JK. 2011. Mechanisms controlling Th17 cytokine expression and host defense. *J Leukoc Biol***90**:263-270. doi:10.1189/jlb.0211099
- Middleton PG, Mall MA, Dřevínek P, Lands LC, McKone EF, Polineni D, Ramsey BW, Taylor-Cousar JL, Tullis E, Vermeulen F, Marigowda G, McKee CM, Moskowitz SM, Nair N, Savage J, Simard C, Tian S, Waltz D, Xuan F, Rowe SM, Jain R. 2019. Elexacaftor-Tezacaftor-Ivacaftor for Cystic Fibrosis with a Single Phe508del Allele. *N Engl J Med***381**:1809-1819. doi:10.1056/NEJMoa1908639
- Morrison CB, Shaffer KM, Araba KC, Markovetz MR, Wykoff JA, Quinney NL, Hao S, Delion MF, Flen AL, Morton LC, Liao J, Hill DB, Drumm ML, O'Neal WK, Kesimer M, Gentzsch M, Ehre C. 2022. Treatment of cystic fibrosis airway cells with CFTR modulators reverses aberrant mucus properties via hydration. *Eur Respir J***59**:2100185. doi:10.1183/13993003.00185-2021
- Pezzulo AA, Tang XX, Hoegger MJ, Abou Alaiwa MH, Ramachandran S, Moninger TO, Karp PH, Wohlford-Lenane CL, Haagsman HP, van Eijk M, Bánfi B, Horswill AR, Stoltz DA, McCray PB, Welsh MJ, Zabner J. 2012. Reduced airway surface pH impairs bacterial killing in the porcine cystic fibrosis lung. *Nature***487**:109-113. doi:10.1038/nature11130
- Pinto MC, Quaresma MC, Silva IAL, Railean V, Ramalho SS, Amaral MD. 2021. Synergy in Cystic Fibrosis Therapies: Targeting SLC26A9. *Int J Mol Sci***22**:13064. doi:10.3390/ijms222313064
- Pranke I, Golec A, Hinzpeter A, Edelman A, Sermet-Gaudelus I. 2019. Emerging Therapeutic Approaches for Cystic Fibrosis. From Gene Editing to Personalized Medicine. *Front Pharmacol***10**.

doi:10.3389/fphar.2019.00121

Quinton PM. 2008. Cystic fibrosis: impaired bicarbonate secretion and mucoviscidosis. *Lancet***372**:415–417. doi:10.1016/S0140-6736(08)61162-9

Quinton PM. 2001. The neglected ion: HCO<sub>3</sub><sup>-</sup>. *Nat Med***7**:292–293. doi:10.1038/85429

Rehman T, Karp PH, Tan P, Goodell BJ, Pezzulo AA, Thurman AL, Thornell IM, Duffey SL, Duffey ME, Stoltz DA, McKone EF, Singh PK, Welsh MJ. 2021. Inflammatory cytokines TNF- $\alpha$  and IL-17 enhance the efficacy of cystic fibrosis transmembrane conductance regulator modulators. *J Clin Invest***131**. doi:10.1172/JCI150398

Rehman T, Thornell IM, Pezzulo AA, Thurman AL, Romano Ibarra GS, Karp PH, Tan P, Duffey ME, Welsh MJ. 2020. TNF $\alpha$  and IL-17 alkalinize airway surface liquid through CFTR and pendrin. *Am J Physiol Physiol***319**:C331–C344. doi:10.1152/ajpcell.00112.2020

Rehman T, Welsh MJ. 2023. Inflammation as a Regulator of the Airway Surface Liquid pH in Cystic Fibrosis. *Cells***12**:1104. doi:10.3390/cells12081104

Roesch EA, Nichols DP, Chmiel JF. 2018. Inflammation in cystic fibrosis: An update. *Pediatr Pulmonol***53**:S30–S50. doi:10.1002/ppul.24129

Saint-Criq V, Delpiano L, Casement J, Onuora JC, Lin JH, Gray MA. 2020. Choice of Differentiation Media Significantly Impacts Cell Lineage and Response to CFTR Modulators in Fully Differentiated Primary Cultures of Cystic Fibrosis Human Airway Epithelial Cells. *Cells***9**. doi:10.3390/cells9092137

Schultz A, Puvvadi R, Borisov SM, Shaw NC, Klimant I, Berry LJ, Montgomery ST, Nguyen T, Kreda SM, Kicic A, Noble PB, Button B, Stick SM. 2017. Airway surface liquid pH is not acidic in children with cystic fibrosis. *Nat Commun***8**:1–8. doi:10.1038/s41467-017-00532-5

Shah VS, Meyerholz DK, Tang XX, Reznikov L, Abou Alaiwa M, Ernst SE, Karp PH, Wohlford-Lenane CL, Heilmann KP, Leidinger MR, Allen PD, Zabner J, McCray PB, Ostedgaard LS, Stoltz DA, Randak CO, Welsh MJ. 2016. Airway acidification initiates host defense abnormalities in cystic fibrosis mice. *Science (80- )***351**:503–507. doi:10.1126/science.aad5589

Shan J, Liao J, Huang J, Robert R, Palmer ML, Fahrenkrug SC, O'Grady SM, Hanrahan JW. 2012. Bicarbonate-dependent chloride transport drives fluid secretion by the human airway epithelial cell line Calu-3. *J Physiol***590**:5273–5297. doi:10.1113/jphysiol.2012.236893

Siew R, Ou T-L, Dahesh S, Akong K, Nizet V. 2022. Bicarbonate Effects on Antibacterial Immunity and

Mucus Glycobiology in the Cystic Fibrosis Lung: A Review With Selected Experimental Observations. *Infect Microbes Dis*4:103–110. doi:10.1097/IM9.000000000000101

Simonin J, Bille E, Crambert G, Noel S, Dreano E, Edwards A, Hatton A, Pranke I, Villeret B, Cottart CH, Vrel JP, Urbach V, Baatallah N, Hinzpeter A, Golec A, Touqui L, Nassif X, Galietta LJV, Planelles G, Sallenave JM, Edelman A, Sermet-Gaudelus I. 2019. Airway surface liquid acidification initiates host defense abnormalities in Cystic Fibrosis. *Sci Rep*9:1–11. doi:10.1038/s41598-019-42751-4

Sly PD, Gangell CL, Chen L, Ware RS, Ranganathan S, Mott LS, Murray CP, Stick SM. 2013. Risk Factors for Bronchiectasis in Children with Cystic Fibrosis. *N Engl J Med*368:1963–1970. doi:10.1056/NEJMoa1301725

Tan H-L, Regamey N, Brown S, Bush A, Lloyd CM, Davies JC. 2011. The Th17 Pathway in Cystic Fibrosis Lung Disease. *Am J Respir Crit Care Med*184:252–258. doi:10.1164/rccm.201102-0236OC

Tang XX, Ostedgaard LS, Hoegger MJ, Moninger TO, Karp PH, McMenimen JD, Choudhury B, Varki A, Stoltz DA, Welsh MJ. 2016. Acidic pH increases airway surface liquid viscosity in cystic fibrosis. *J Clin Invest*126:879–891. doi:10.1172/JCI83922

Zajac M, Dreano E, Edwards A, Planelles G, Sermet-gaudelus I. 2021. Airway surface liquid ph regulation in airway epithelium current understandings and gaps in knowledge. *Int J Mol Sci*22:1–24. doi:10.3390/ijms22073384
